# Supplementary material
Source: publisher figshare collection journal article supplement (https://gsapubs.figshare.com/ndownloader/files/22409709)
Supplement: Supplementary file 1 [file 22409709]

## Sheet: Sheet1
Andersen, D.W., Shostak, N.C., Locke, K.M., Ramstetter, N.P., and Metzger, E.P., 2016, Composition of sediment records late Quaternary paleogeographic evolution of Santa Clara Valley, California: Geosphere, v. 12, doi:10.1130/GES01259.1.
SUPPLEMENTAL TABLE 1. COMPOSITION OF CLASTS IN GRAVEL FROM SANTA CLARA VALLEY WELLS
Coyote Creek Outdoor Classroom Well (CCOC)
Sample depth (m)		20.1	52.1	88.7	125	140.2	167.9	192.3	222.8	253.3	283.5
Number of clasts counted		277	304	463	407	260	374	315	356	149	290
Percent of clasts counted
Sedimentary rocks
	graywacke	66.787	56.9079	42.7646	50.3686	49.6154	41.9786	45.3968	48.5955	34.2282	40.3448
	argillite	5.77617	2.96053	12.311	5.65111	6.92308	8.28877	6.98413	5.33708	4.69799	8.62069
	conglomerate	-	-	0.647948	1.2285	-	0.534759	0.634921	0.280899	-	1.03448
	sandstone	0.361011	0.986842	4.10367	3.1941	1.92308	10.1604	4.7619	8.98876	6.04027	10
	siltstone	-	-	-	-	-	-	-	-	-	0.344828
	radiolarian chert	2.52708	8.55263	8.42333	7.12531	7.30769	4.0107	5.07937	4.77528	4.69799	2.75862
	laminated chert	0.722022	0.657895	-	-	-	-	-	-	-	-
Igneous rocks
	granite and tonalite	-	1.64474	-	-	-	-	-	-	-	0.689655
	diorite and gabbro	-	0.328947	0.431965	-	-	0.26738	1.26984	0.280899	0.671141	1.03448
	ultramafic rock	-	-	-	-	-	-	-	-	-	-
	rhyolite	-	0.328947	-	0.2457	-	-	-	0.280899	-	-
	andesite	1.08303	-	-	-	-	-	-	-	-	0.344828
	basalt	-	-	-	-	-	-	0.31746	-	-	-
	porphyry	-	0.986842	0.647948	-	1.15385	0.26738	0.31746	-	-	-
Metamorphic rocks
	metavolcanic rock	16.2455	19.0789	20.5184	20.3931	21.9231	21.3904	23.8095	15.4494	29.5302	18.2759
	metadiabase	0.722022	1.64474	2.59179	0.982801	0.769231	2.13904	1.26984	1.1236	1.34228	1.72414
	serpentinite	-	1.31579	0.431965	0.2457	0.384615	0.534759	1.90476	1.1236	2.01342	1.72414
	eclogite	-	-	-	-	-	-	-	-	-	-
	blueschist	-	-	0.215983	-	-	0.26738	-	-	0.671141	-
	other schist	-	-	-	-	-	0.26738	0.31746	-	0.671141	-
	vein quartz	1.80505	1.31579	3.45572	6.14251	6.15385	6.14973	4.44444	6.17978	8.05369	6.89655
	quartzite	0.722022	0.657895	0.215983	-	-	0.26738	-	-	-	-
Undetermined		3.2491	2.63158	3.23974	4.4226	3.84615	3.47594	3.49206	7.58427	7.38255	6.2069
Total *		100	100	100	100	100	100	100	100	100	100
	* Note: actual values (e.g., 0.43) sum to 100 percent, but rounded values shown here (e.g., 0.4) may not
	" - " indicates clast type not detected
SUPPLEMENTAL TABLE 1 (CONT.)
Guadalupe Well (GUAD)
Sample depth (m)		39.3	82
Number of clasts counted		279	428
Percent of clasts counted
Sedimentary rocks
	graywacke	59.4982	57.4766
	argillite	5.37634	2.80374
	conglomerate	0.358423	0.233645
	sandstone	4.6595	6.30841
	siltstone	0.716846	1.16822
	radiolarian chert	2.15054	1.63551
	laminated chert	-	0.700935
Igneous rocks
	granite and tonalite	-	2.1028
	diorite and gabbro	2.15054	2.1028
	ultramafic rock	-	-
	rhyolite	1.07527	4.90654
	andesite	0.358423	0.46729
	basalt	-	1.86916
	porphyry	2.86738	1.86916
Metamorphic rocks
	metavolcanic rock	11.828	11.4486
	metadiabase	3.58423	1.16822
	serpentinite	-	-
	eclogite	-	-
	blueschist	0.358423	-
	other schist	-	0.233645
	vein quartz	0.358423	1.16822
	quartzite	0.716846	-
Undetermined		3.94265	2.33645
Total *		100	100
	* Note: actual values (e.g., 0.43) sum to 100 percent, but rounded values shown here (e.g., 0.4) may not
	" - " indicates clast type not detected
SUPPLEMENTAL TABLE 1 (CONT.)
McGlincy Well (MGCY)
Sample depth (m)		9	17	26	34	42	47	70	89	98	125
Number of clasts counted		523	517	505	392	163	426	494	331	328	368
Percent of clasts counted
Sedimentary rocks
	graywacke	58.1262	66.9246	70.099	72.9592	68.0982	60.7981	67.6113	66.1631	68.9024	56.7935
	argillite	8.03059	4.44874	1.78218	3.57143	3.06748	3.52113	3.84615	3.32326	1.82927	2.17391
	conglomerate	-	-	-	-	-	-	0.202429	-	-	-
	sandstone	4.97132	4.0619	3.76238	1.53061	-	6.57277	3.03644	5.43807	3.65854	4.34783
	siltstone	2.48566	0.967118	0.792079	0.510204	0.613497	1.17371	1.417	2.1148	0.609756	1.08696
	radiolarian chert	1.14723	0.773694	-	1.53061	1.22699	1.17371	2.02429	1.51057	1.82927	1.3587
	laminated chert	-	-	-	-	-	-	-	-	-	-
Igneous rocks
	granite and tonalite	1.14723	1.54739	3.56436	1.78571	1.84049	1.87793	2.42915	0.302115	1.52439	1.08696
	diorite and gabbro	1.91205	1.74081	0.19802	-	-	0.234742	1.01215	0.906344	-	0.815217
	ultramafic rock	-	-	-	-	-	0.234742	-	-	-	-
	rhyolite	0.573614	0.773694	0.19802	-	-	1.17371	0.809717	0.906344	2.13415	2.17391
	andesite	0.191205	0.386847	0.39604	-	-	0.938967	2.22672	2.1148	1.82927	1.90217
	basalt	1.33843	0.773694	0.792079	0.255102	0.613497	0.704225	-	0.302115	0.304878	1.3587
	porphyry	1.14723	0.193424	0.792079	-	4.90798	3.05164	1.61943	2.71903	2.43902	2.17391
Metamorphic rocks
	metavolcanic rock	12.6195	11.0251	11.2871	11.9898	10.4294	13.3803	9.31174	9.66767	9.14634	15.2174
	metadiabase	1.33843	1.54739	1.9802	0.255102	1.22699	1.40845	0.809717	0.60423	1.21951	1.08696
	serpentinite	0.382409	0.773694	1.38614	1.78571	1.22699	-	0.404858	1.51057	1.82927	4.34783
	eclogite	-	-	-	-	-	-	-	-	-	-
	blueschist	0.382409	-	-	-	-	-	-	-	0.304878	0.543478
	other schist	-	0.193424	-	-	-	-	-	-	0.304878	0.815217
	vein quartz	0.573614	0.386847	0.39604	0.510204	-	0.704225	-	-	0.304878	-
	quartzite	-	-	-	-	-	-	-	-	0.304878	-
Undetermined		3.63289	3.48162	2.57426	3.31633	6.74847	3.05164	3.23887	2.41692	1.52439	2.71739
Total *		100	100	100	100	100	100	100	100	100	100
	* Note: actual values (e.g., 0.43) sum to 100 percent, but rounded values shown here (e.g., 0.4) may not
	" - " indicates clast type not detected
SUPPLEMENTAL TABLE 1 (CONT.)
Santana Park Well (STPK)
Sample depth (m)		19.5	33.2	51.5	62.2	88.1	109.4	130.8	167.3	182.6	210
Number of clasts counted		403	313	332	299	373	396	232	519	208	208
Percent of clasts counted
Sedimentary rocks
	graywacke	65.2605	63.5783	65.0602	65.5518	70.5094	71.4646	65.9483	62.8131	61.5385	54.8077
	argillite	3.22581	2.8754	2.10843	2.67559	1.07239	3.0303	2.15517	4.23892	2.40385	6.25
	conglomerate	-	-	-	-	-	-	-	-	-	-
	sandstone	2.48139	5.11182	5.12048	3.34448	1.87668	2.0202	-	2.31214	1.44231	0.961538
	siltstone	0.496278	0.638978	0.60241	1.00334	0.536193	-	0.431034	1.15607	0.961538	0.480769
	radiolarian chert	0.992556	0.958466	0.60241	2.67559	1.60858	1.26263	1.2931	0.770713	2.40385	1.92308
	laminated chert	-	-	-	-	-	-	-	-	-	-
Igneous rocks
	granite and tonalite	1.73697	6.07029	3.91566	4.34783	2.94906	2.27273	3.87931	1.7341	2.88462	3.84615
	diorite and gabbro	-	-	0.301205	0.334448	-	-	0.431034	0.192678	0.961538	0.480769
	ultramafic rock	-	-	-	-	-	-	-	-	-	-
	rhyolite	0.744417	-	0.301205	-	0.536193	1.0101	0.862069	-	-	2.40385
	andesite	1.48883	0.638978	1.20482	2.00669	0.80429	0.757576	0.862069	1.34875	1.44231	1.44231
	basalt	0.248139	1.27796	-	-	1.87668	0.757576	-	0.192678	0.480769	0.961538
	porphyry	0.496278	1.59744	0.903614	0.668896	0.80429	0.505051	3.44828	2.31214	1.44231	0.961538
Metamorphic rocks
	metavolcanic rock	10.4218	10.5431	12.0482	9.0301	11.5282	10.8586	14.2241	14.6435	13.9423	16.8269
	metadiabase	2.72953	1.59744	2.71084	3.34448	2.94906	1.26263	0.431034	1.92678	3.36538	1.44231
	serpentinite	4.96278	-	0.903614	2.00669	0.80429	0.757576	2.58621	2.6975	3.36538	1.44231
	eclogite	-	-	-	-	-	-	-	-	-	-
	blueschist	-	-	0.301205	-	0.268097	-	0.431034	0.385356	0.480769	-
	other schist	-	-	0.301205	-	-	-	-	-	-	-
	vein quartz	0.248139	1.27796	0.301205	0.334448	-	0.757576	-	0.578035	0.961538	1.44231
	quartzite	-	-	-	-	-	0.505051	-	-	0.480769	-
Undetermined		4.4665	3.83387	3.31325	2.67559	1.87668	2.77778	3.01724	2.6975	1.44231	4.32692
Total *		100	100	100	100	100	100	100	100	100	100
	* Note: actual values (e.g., 0.43) sum to 100 percent, but rounded values shown here (e.g., 0.4) may not
	" - " indicates clast type not detected
SUPPLEMENTAL TABLE 1 (CONT.)
Willow Well (WLLO)
Sample depth (m)		15.2	26.8	46.9	76.2	108.2	115.8	134.1	143.3	164.6	176.8	204.2	239.3
Number of clasts counted		357	375	355	423	517	495	284	225	370	286	347	247
Percent of clasts counted
Sedimentary rocks
	graywacke	61.6246	65.0667	61.1268	53.1915	53.5783	53.3333	55.6338	63.1111	41.3514	50.6993	45.8213	37.6518
	argillite	7.0028	7.73333	7.32394	8.74704	8.31721	3.23232	8.09859	4	5.94595	3.84615	3.17003	4.45344
	conglomerate	0.280112	-	0.84507	-	-	-	0.352113	-	0.27027	-	-	-
	sandstone	1.96078	4.53333	4.78873	6.38298	1.93424	2.0202	2.46479	2.22222	1.89189	1.04895	0.576369	2.02429
	siltstone	1.96078	-	-	0.236407	-	0.606061	0.704225	-	0.810811	-	-	0.404858
	radiolarian chert	1.12045	1.06667	2.25352	1.89125	5.22244	5.85859	3.16901	6.22222	9.72973	8.04196	10.3746	2.42915
	laminated chert	-	-	-	-	-	0.20202	-	-	-	-	-	-
Igneous rocks
	granite and tonalite	2.2409	-	-	0.70922	0.386847	1.81818	0.352113	-	1.35135	0.34965	0.576369	1.61943
	diorite and gabbro	1.96078	2.13333	1.40845	1.41844	0.193424	0.808081	1.76056	-	0.540541	-	0.576369	1.61943
	ultramafic rock	-	-	-	-	0.193424	-	-	-	-	-	-	-
	rhyolite	1.40056	0.8	0.56338	1.18203	0.580271	1.81818	1.05634	0.888889	0.810811	1.04895	0.576369	0.809717
	andesite	-	0.533333	-	1.41844	-	-	-	0.444444	0.27027	0.34965	-	-
	basalt	-	1.06667	0.56338	-	2.70793	0.20202	1.76056	0.888889	-	1.04895	0.288184	1.61943
	porphyry	0.840336	0.8	0.56338	3.07329	2.12766	1.61616	2.46479	0.888889	1.89189	2.44755	1.44092	1.21457
Metamorphic rocks
	metavolcanic rock	13.1653	10.6667	14.0845	13.7116	13.9265	19.798	14.7887	11.1111	27.5676	19.9301	20.7493	26.7206
	metadiabase	0.840336	1.06667	0.84507	2.83688	1.74081	3.0303	2.11268	-	0.540541	1.3986	2.01729	2.83401
	serpentinite	0.560224	0.533333	-	0.236407	0.967118	0.20202	0.352113	1.33333	1.35135	1.74825	5.76369	3.23887
	eclogite	-	-	-	-	-	-	-	-	-	0.34965	0.864553	2.42915
	blueschist	-	-	-	-	-	0.40404	-	0.888889	0.810811	1.74825	1.15274	0.809717
	other schist	0.560224	-	-	0.236407	0.193424	0.40404	0.352113	-	0.540541	0.699301	-	3.64372
	vein quartz	-	-	1.12676	0.70922	2.32108	0.808081	0.704225	3.11111	0.27027	0.34965	0.864553	0.809717
	quartzite	0.280112	0.266667	-	-	-	0.20202	-	0.888889	-	-	-	-
Undetermined		4.20168	3.73333	4.50704	4.01891	5.60928	3.63636	3.87324	4	4.05405	4.8951	5.18732	5.66802
Total *		100	100	100	100	100	100	100	100	100	100	100	100
	* Note: actual values (e.g., 0.43) sum to 100 percent, but rounded values shown here (e.g., 0.4) may not
	" - " indicates clast type not detected
